# Supplementary material
Source: MDPI journal article supplement (https://www.mdpi.com/1999-4907/13/11/1777)
Supplement: s1 [file s1]

# Supplemental information

**Table S1.** Characteristics of the 45 sample stands in the boreal forests of Ontario, Canada.

| Stand age | Overstorey <sup>a</sup> | N | Stand density (stems ha <sup>-1</sup> ) or basal area (m <sup>2</sup> ha <sup>-1</sup> ) <sup>b</sup> | Variables                   |                                        | Total live biomass C (Mg/ha) <sup>b</sup> | Total deadwood C (Mg/ha) <sup>b</sup> | Forest floor C (Mg/ha) <sup>b</sup> | Mineral soil C (Mg/ha) <sup>b</sup> | Total ecosystem C (Mg/ha) <sup>b</sup> |
|-----------|-------------------------|---|-------------------------------------------------------------------------------------------------------|-----------------------------|----------------------------------------|-------------------------------------------|---------------------------------------|-------------------------------------|-------------------------------------|----------------------------------------|
|           |                         |   |                                                                                                       | Profit (\$/ha) <sup>b</sup> | Net present value (\$/ha) <sup>b</sup> |                                           |                                       |                                     |                                     |                                        |
| 8         | B                       | 3 | 5933 (581)                                                                                            | -45.0 (0.60)                | -45.0 (0.60)                           | 9.35 (1.26)                               | 15.21 (3.55)                          | 17.4 (5.09)                         | 70.17 (3.09)                        | 112.1 (6.5)                            |
|           | C                       | 3 | 7067 (1551)                                                                                           | -775.2 (0.94)               | -775.2 (0.94)                          | 12.57 (1.1)                               | 14.69 (3.50)                          | 11.64 (5.20)                        | 53.56 (6.20)                        | 92.46 (8.9)                            |
|           | M                       | 3 | 6933 (926)                                                                                            | -858.2 (0.77)               | -858.2 (0.77)                          | 10.95 (1.75)                              | 13.16 (8.57)                          | 7.47 (1.48)                         | 55.24 (5.50)                        | 86.81 (3.26)                           |
| 34        | B                       | 3 | 26 (1)                                                                                                | 375.1 (18.4)                | 135.3 (6.62)                           | 73.64 (4.32)                              | 15.27 (6.49)                          | 43.57 (9.65)                        | 60.66 (8.57)                        | 193.1 (7.97)                           |
|           | C                       | 3 | 28 (2)                                                                                                | 395.4 (135.2)               | 142.6 (48.8)                           | 67.63 (4.37)                              | 12.32 (3.44)                          | 12.71 (1.74)                        | 59.8 (5.31)                         | 152.46 (9.5)                           |
|           | M                       | 3 | 13 (1)                                                                                                | -353.2 (70.6)               | -127.4 (25.5)                          | 44.13 (5.20)                              | 12.89 (1.45)                          | 52.74 (18.4)                        | 85.0 (16.7)                         | 194.8 (10.0)                           |
| 99        | B                       | 3 | 51 (7)                                                                                                | 1118.4 (143.5)              | 30.3 (3.9)                             | 195.07 (24.48)                            | 14.28 (2.98)                          | 39.66 (9.38)                        | 74.85 (3.85)                        | 323.9 (12.9)                           |
|           | C                       | 3 | 52 (2)                                                                                                | 2914.6 (208.4)              | 78.9 (5.6)                             | 147.76 (11.1)                             | 17.40 (1.68)                          | 76.07 (6.85)                        | 67.55 (14.7)                        | 308.8 (6.17)                           |
|           | M                       | 3 | 43 (5)                                                                                                | 1950.1 (1060.6)             | 52.8 (28.7)                            | 139.45 (25.1)                             | 27.72 (5.03)                          | 44.52 (21.5)                        | 72.4 (13.7)                         | 284.1 (31.7)                           |
| 147       | B                       | 3 | 58 (8)                                                                                                | 1613.2 (512.1)              | 6.9 (2.2)                              | 221.86 (23.44)                            | 15.58 (3.62)                          | 30.9 (2.91)                         | 81.17 (3.52)                        | 349.5 (17.8)                           |
|           | C                       | 3 | 51 (9)                                                                                                | 2660.7 (538.6)              | 11.4 (2.3)                             | 163.01 (31.44)                            | 32.39 (7.09)                          | 49.19 (12.9)                        | 71.60 (3.74)                        | 316.7 (11.4)                           |
|           | M                       | 3 | 35 (1)                                                                                                | 2024.3 (651.1)              | 8.68 (2.8)                             | 126.83 (6.45)                             | 19.91 (1.48)                          | 42.12 (5.68)                        | 122.8 (9.15)                        | 311.7 (11.4)                           |
| 210       | B                       | 3 | 41 (3)                                                                                                | 1501.7 (197.4)              | 0.54 (0.07)                            | 151.23 (17.43)                            | 16.37 (3.72)                          | 47.86 (8.59)                        | 64.46 (0.39)                        | 279.9 (12.5)                           |
|           | C                       | 3 | 40 (8)                                                                                                | 2856 (995.3)                | 1.03 (0.36)                            | 122.73 (25.15)                            | 18.54 (5.01)                          | 24.67 (1.25)                        | 73.0 (5.2)                          | 238.9 (30.8)                           |
|           | M                       | 3 | 46 (3)                                                                                                | 3554.1 (874.3)              | 1.29 (0.32)                            | 163.36 (8.30)                             | 16.14 (4.58)                          | 45.0 (6.35)                         | 70.13 (14.2)                        | 294.6 (16.6)                           |

Notes: Each age-overstorey combination has three replications.

<sup>a</sup> Overstorey types: B = broadleaf, C = conifer, M = mixedwoods.

<sup>b</sup> Values are means with 1 SE in parentheses. Stand density (stems ha<sup>-1</sup>) was determined for the younger (8 years old) stands and basal area (m<sup>2</sup> ha<sup>-1</sup>) for older stands.

**Table S2.** The relationships between total ecosystem carbon, total live biomass carbon, total deadwood carbon, forest floor carbon, mineral soil carbon and profit for overall and individual overstorey compositions.

| Response                         | Intercept |      |      | Profit |      |      | Profit^2 |      |       | $R^2$    |
|----------------------------------|-----------|------|------|--------|------|------|----------|------|-------|----------|
|                                  | mean      | SE   | t    | mean   | SE   | t    | mean     | SE   | t     | adjusted |
| <i>Total ecosystem carbon</i>    |           |      |      |        |      |      |          |      |       |          |
| Broadleaf                        | 137       | 17.4 | 7.89 | 258    | 30.4 | 8.5  | -80.4    | 12.6 | -6.38 | 0.70     |
| Mixedwood                        | 207       | 5.56 | 37.3 | 90.3   | 6.48 | 13.9 | -17.5    | 1.59 | -10.9 | 0.85     |
| Conifer                          | 151       | 8.42 | 17.9 | 90.7   | 8.23 | 11.0 | -13.2    | 2.44 | -5.40 | 0.85     |
| Overall                          | 197       | 6.83 | 28.8 | 96.9   | 7.89 | 12.3 | -19.4    | 2.14 | -9.08 | 0.60     |
| <i>Total live biomass carbon</i> |           |      |      |        |      |      |          |      |       |          |
| Broadleaf                        | 27.3      | 16.7 | 1.63 | 228    | 29.2 | 7.83 | -71.3    | 12.1 | -5.89 | 0.66     |
| Mixedwood                        | 70.3      | 4.19 | 16.8 | 54.9   | 4.88 | 11.2 | -8.78    | 1.2  | -7.29 | 0.81     |
| Conifer                          | 52.7      | 5.39 | 9.76 | 54.5   | 5.27 | 10.3 | -6.37    | 1.56 | -4.07 | 0.86     |
| Overall                          | 79.2      | 6.45 | 12.3 | 67.6   | 7.44 | 9.08 | -12.9    | 2.02 | -6.40 | 0.46     |
| <i>Total deadwood carbon</i>     |           |      |      |        |      |      |          |      |       |          |
| Mixedwood                        | 17.0      | 1.28 | 13.3 | 3.79   | 1.49 | 2.55 | -0.82    | 0.36 | -2.24 | 0.11     |
| Conifer                          | 16.2      | 1.80 | 8.96 | 2.06   | 0.86 | 2.40 | -        | -    | -     | 0.12     |
| Overall                          | 16.1      | 0.85 | 18.9 | 3.36   | 0.98 | 3.42 | -0.61    | 0.27 | -2.27 | 0.10     |
| <i>Forest floor carbon</i>       |           |      |      |        |      |      |          |      |       |          |
| Broadleaf                        | 24.9      | 4.23 | 5.90 | 21.3   | 7.39 | 2.87 | -6.76    | 3.06 | -2.21 | 0.17     |
| Mixedwood                        | 38.3      | 3.58 | 10.7 | 12.5   | 4.18 | 2.99 | -2.58    | 1.03 | -2.50 | 0.17     |
| Conifer                          | 23.8      | 4.46 | 5.34 | 26.7   | 4.36 | 6.13 | -5.53    | 1.29 | -4.28 | 0.54     |
| Overall                          | 30.2      | 2.25 | 13.4 | 17.1   | 2.59 | 6.59 | -3.21    | 0.71 | -4.56 | 0.31     |
| <i>Mineral soil carbon</i>       |           |      |      |        |      |      |          |      |       |          |
| Mixedwood                        | 69.2      | 2.31 | 29.9 | 4.29   | 2.25 | 1.91 | -0.70    | 0.74 | -0.95 | 0.43     |
| Conifer                          | 59.1      | 2.56 | 23.1 | 5.75   | 2.49 | 2.30 |          |      |       | 0.20     |
| Overall                          | 71.9      | 2.42 | 29.7 | 8.91   | 2.79 | 3.19 | -2.69    | 0.76 | -3.55 | 0.09     |

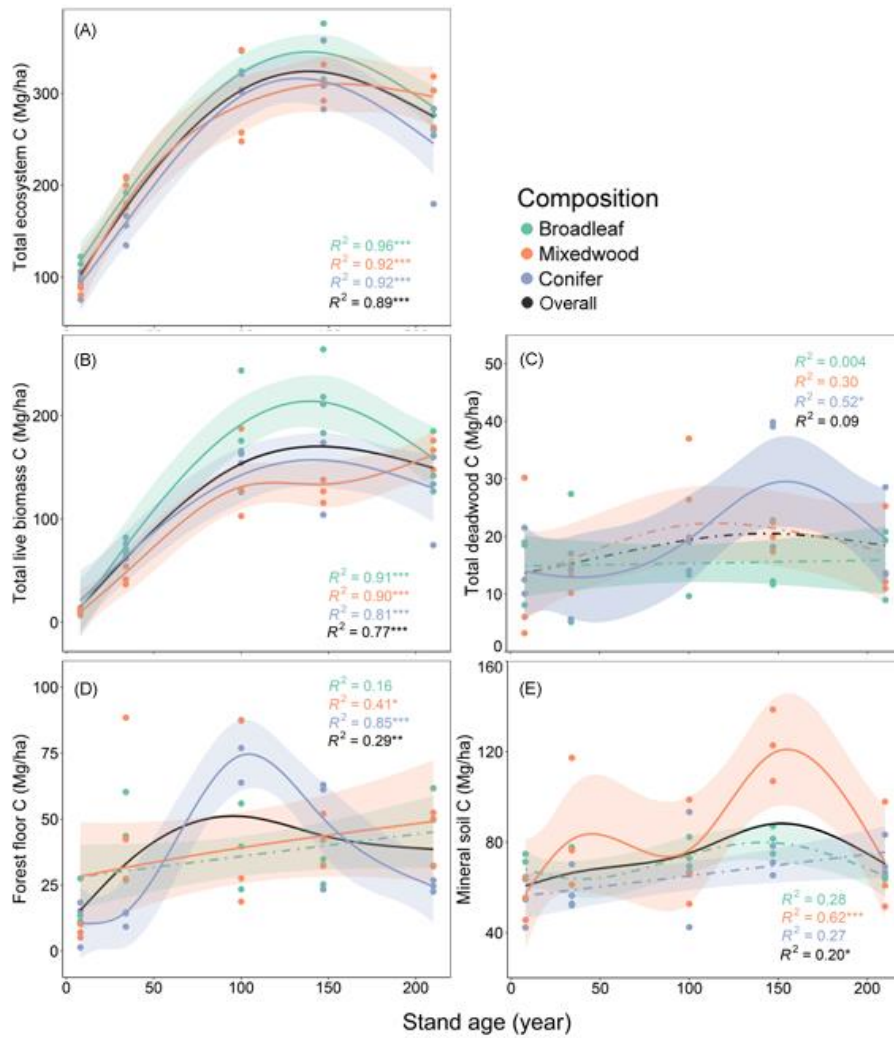

**Figure S1.** Trends in total ecosystem carbon (C), total live biomass C, total deadwood C, forest floor C and mineral soil C with rotation age and overstorey compositions. The lines indicate smooth functions of the best model fit for the long-term trends using general additive models (GAM). Solid lines represent statistically significant trends while dashed lines show the insignificant trends. Shaded regions are the approximate 95% confidence intervals. Adjusted  $R^2$  values indicate the model fit. Significant differences ( $\alpha = 0.05$ ). Significant codes (p-value): 0 '\*\*\*', 0.001 '\*\*', 0.01 '\*'.

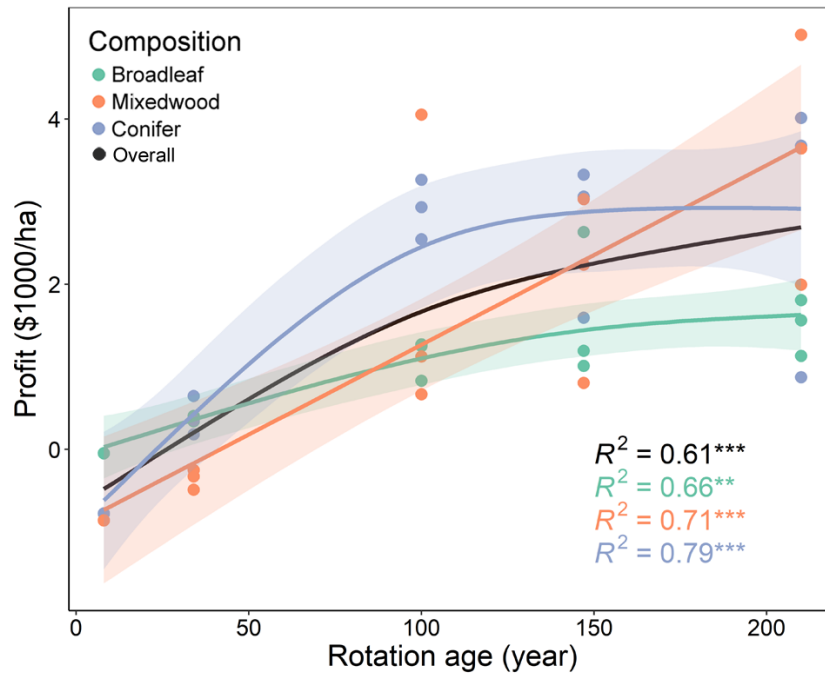

**Figure S2.** Trends in changing profits with rotation ages and overstorey compositions. The lines indicate smooth functions of the best model fit for the long-term trends using general additive models (GAM). Shaded regions are the approximate 95% confidence intervals. Adjusted  $R^2$  values indicate the model fit. Significant differences ( $\alpha = 0.05$ ). Significant codes (p-value): 0 ‘\*\*\*’, 0.001 ‘\*\*’, 0.01 ‘\*’.

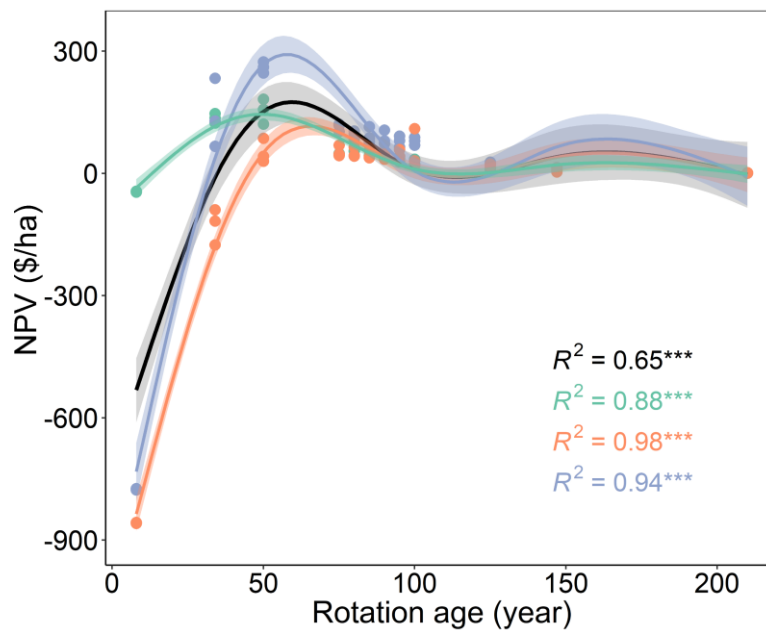

**Figure S3.** Trends in changing the net present value (NPV) with rotation ages and overstorey compositions. The lines indicate smooth functions of the best model fit for the long-term trends using general additive models (GAM). Shaded regions are the approximate 95% confidence intervals. Adjusted  $R^2$  values indicate the model fit. Significant differences ( $\alpha = 0.05$ ). Significant codes (p-value): 0 ‘\*\*\*’, 0.001 ‘\*\*’, 0.01 ‘\*’.
